# Supplementary material for: An immune score reflecting pro- and anti-tumoural balance of tumour microenvironment has major prognostic impact and predicts immunotherapy response in solid cancers
Source: PubMed Central journal article supplement (PMC9918750; doi:10.1016/j.ebiom.2023.104452), 2023-01-30
Supplement: mmc1.pdf [file mmc1.pdf]

## Supplementary Figures

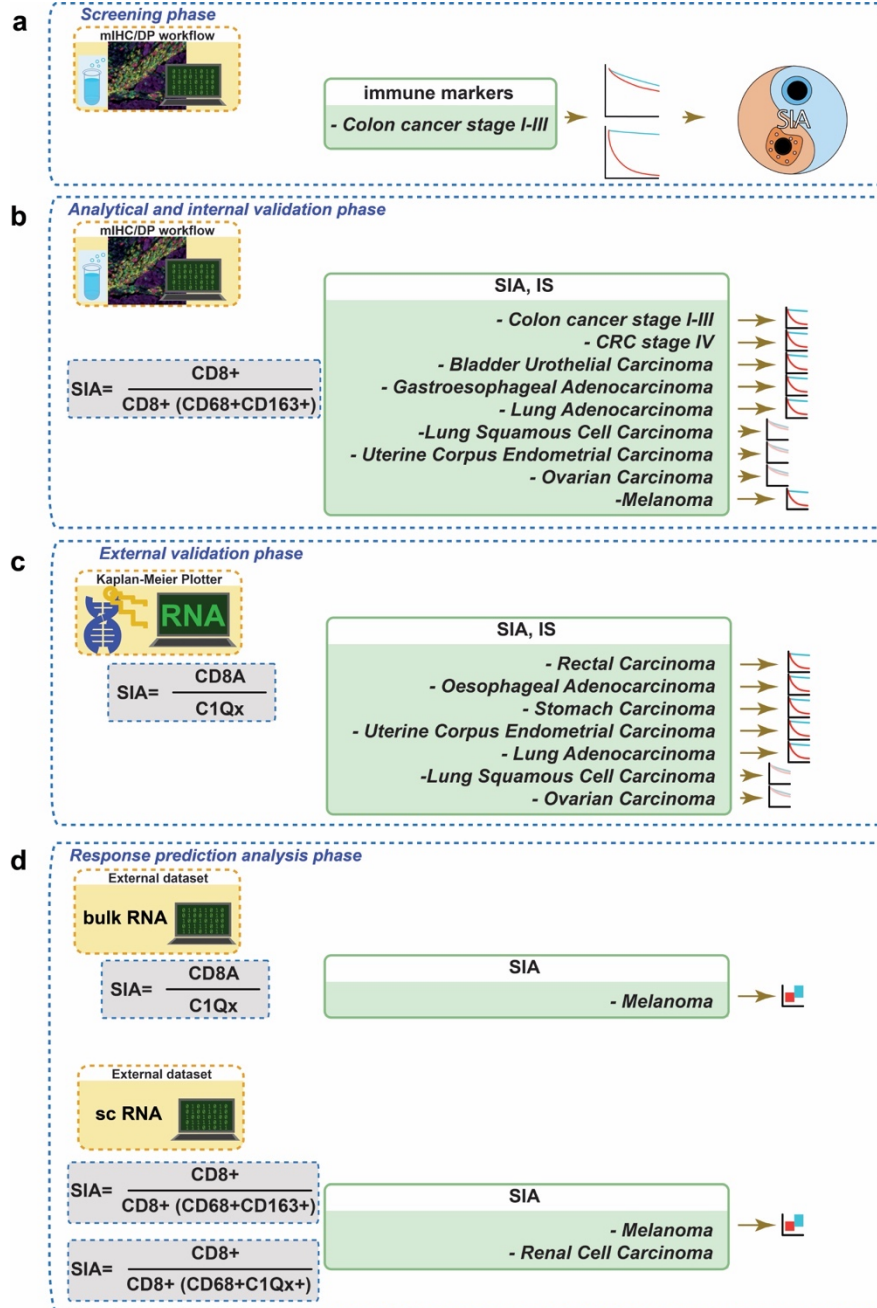

**Supplementary Figure 1 Study schematics.** (a) Screening phase was implemented using colon cancer stage I-III tissue collection and mIHC/DP workflow. (b) Analytical and internal validation phase was implemented by applying mIHC/DP workflow in several independent cancer tissue collections. (c) In the External validation phase the KM plotter database of the bulk RNA expression was used to estimate the impact on survival in several cancers. (d) The datasets with bulk RNA expression and single cell RNA data were used to estimate the capacity of the analysed biomarker to predict the response to the immune therapy.

Abbreviations: mIHC/DP, multiplex immunohistochemistry / digital pathology;

### Image analysis pipeline

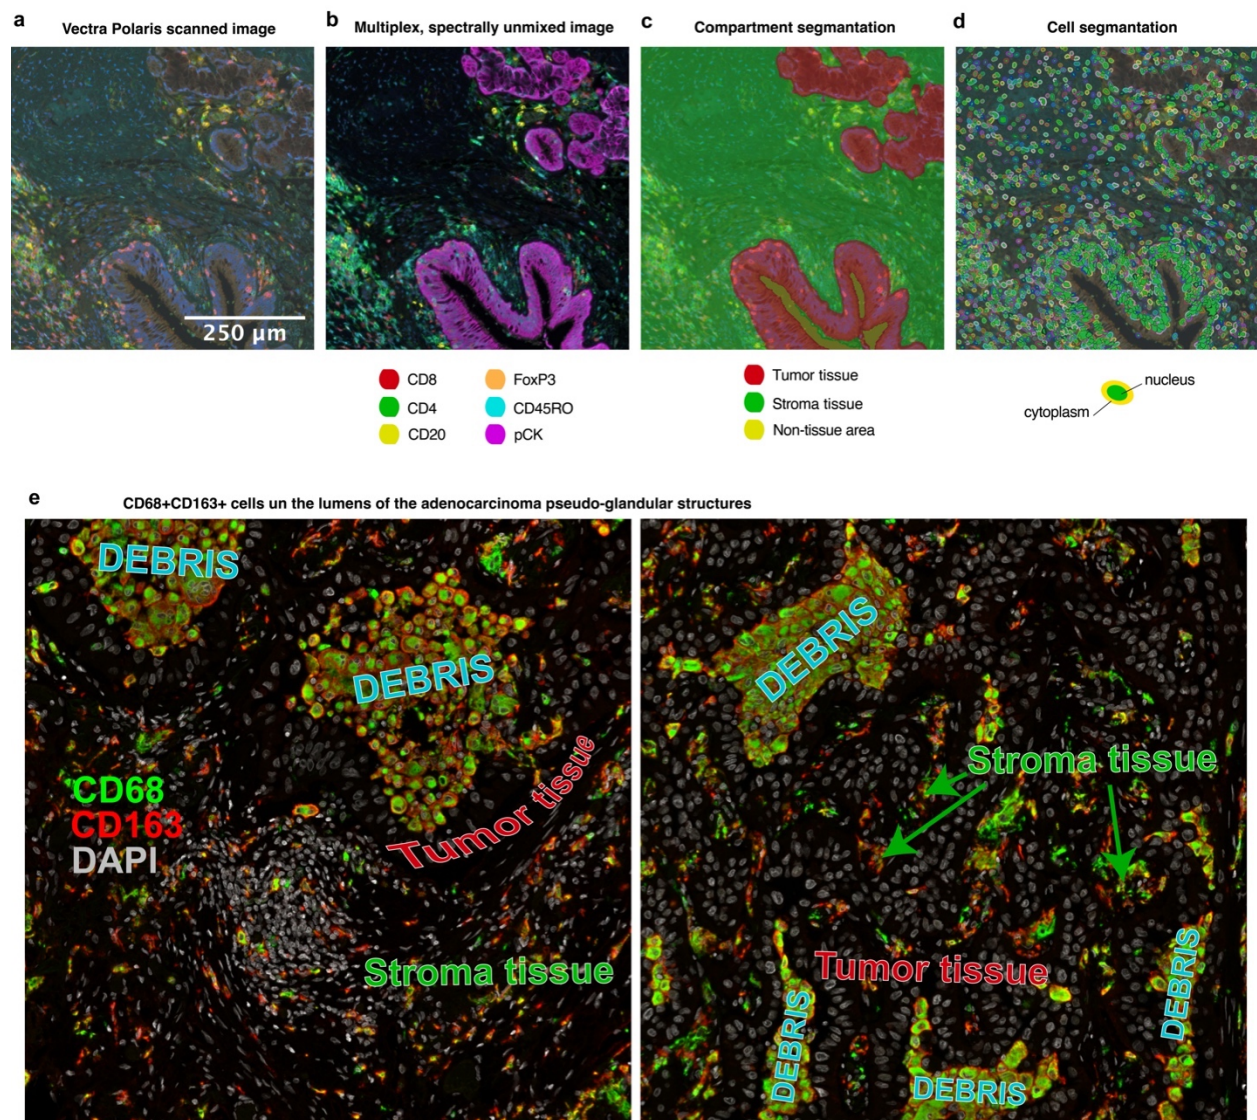

**Supplementary Figure 2, Related to Figure 1. Image analysis pipeline and illustration of spectral unmixing, compartment segmentation and cell segmentation.** The multi-layer multispectral image (a) is processed through the spectral unmixing algorithm to generate an oligo-layer image, where each grey-scale layer corresponds to either specific marker (immune or pan-cytokeratin), or DAPI (DNA stain) or tissue autofluorescence. (b) For visualization purposes the grey-scale layers are assigned different colours, and the combined layers demonstrated as a multi-colour image. (c) The tumour tissue, stroma and non-tissue compartments are classified using a machine-learning image analysis approach, and classification results are demonstrated by colour masks. (d) The cell nuclei are segmented using DAPI staining and algorithm that considered the size, intensity and other features of DAPI-stained regions. Perinuclear regions are considered as cell cytoplasm. Nuclei are visualized as green masks and cell cytoplasm regions as perinuclear coloured masks (colours are arbitrary and only for visualization purposes). Each image is curated by a pathologist and areas of necrosis, artefacts and debris (e) are excluded.

**a**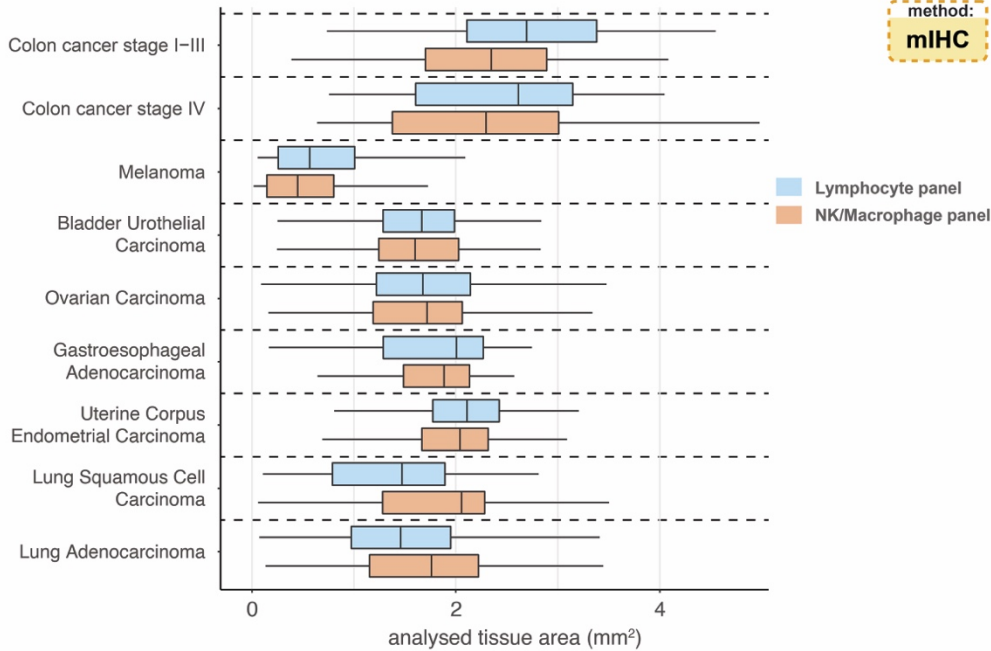**b**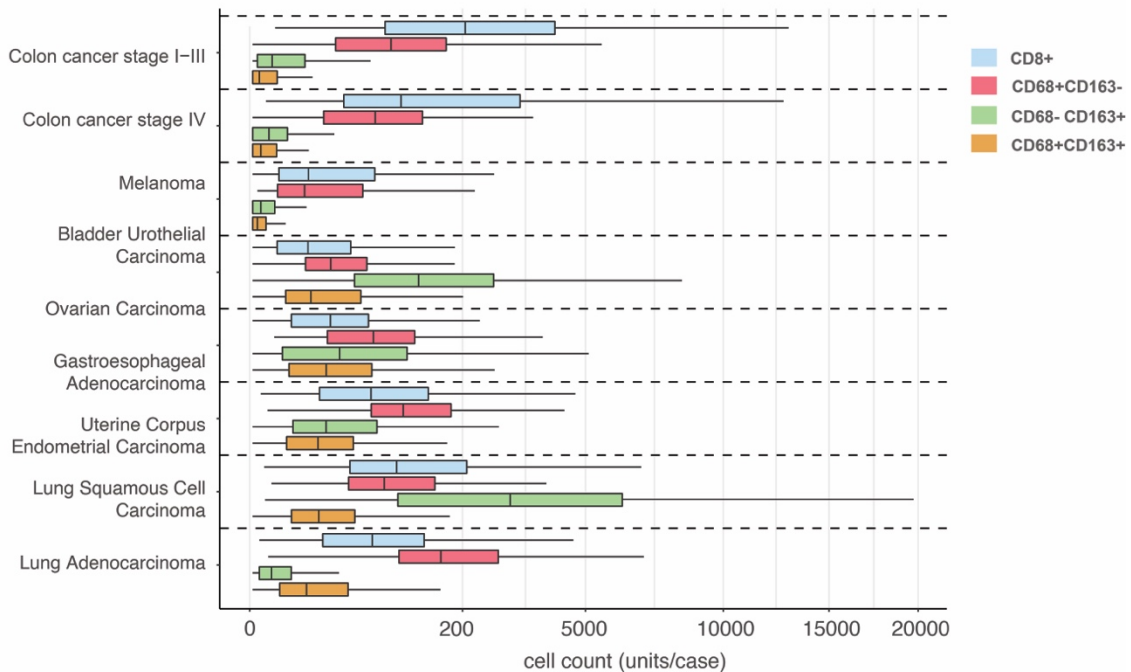

**Supplementary Figure 3, Related to Figure 1. Characteristics of the analysed tissue samples from different TMA cohorts.** Box-plots, representing the (a) analysed tissue area available for the analysis per patient, and (b) absolute cell counts available for the analysis per patient (horizontal axis is root-transformed). Boxes, median and interquartile range (IQR) of the ratios; whiskers, 1.5 IQR



a

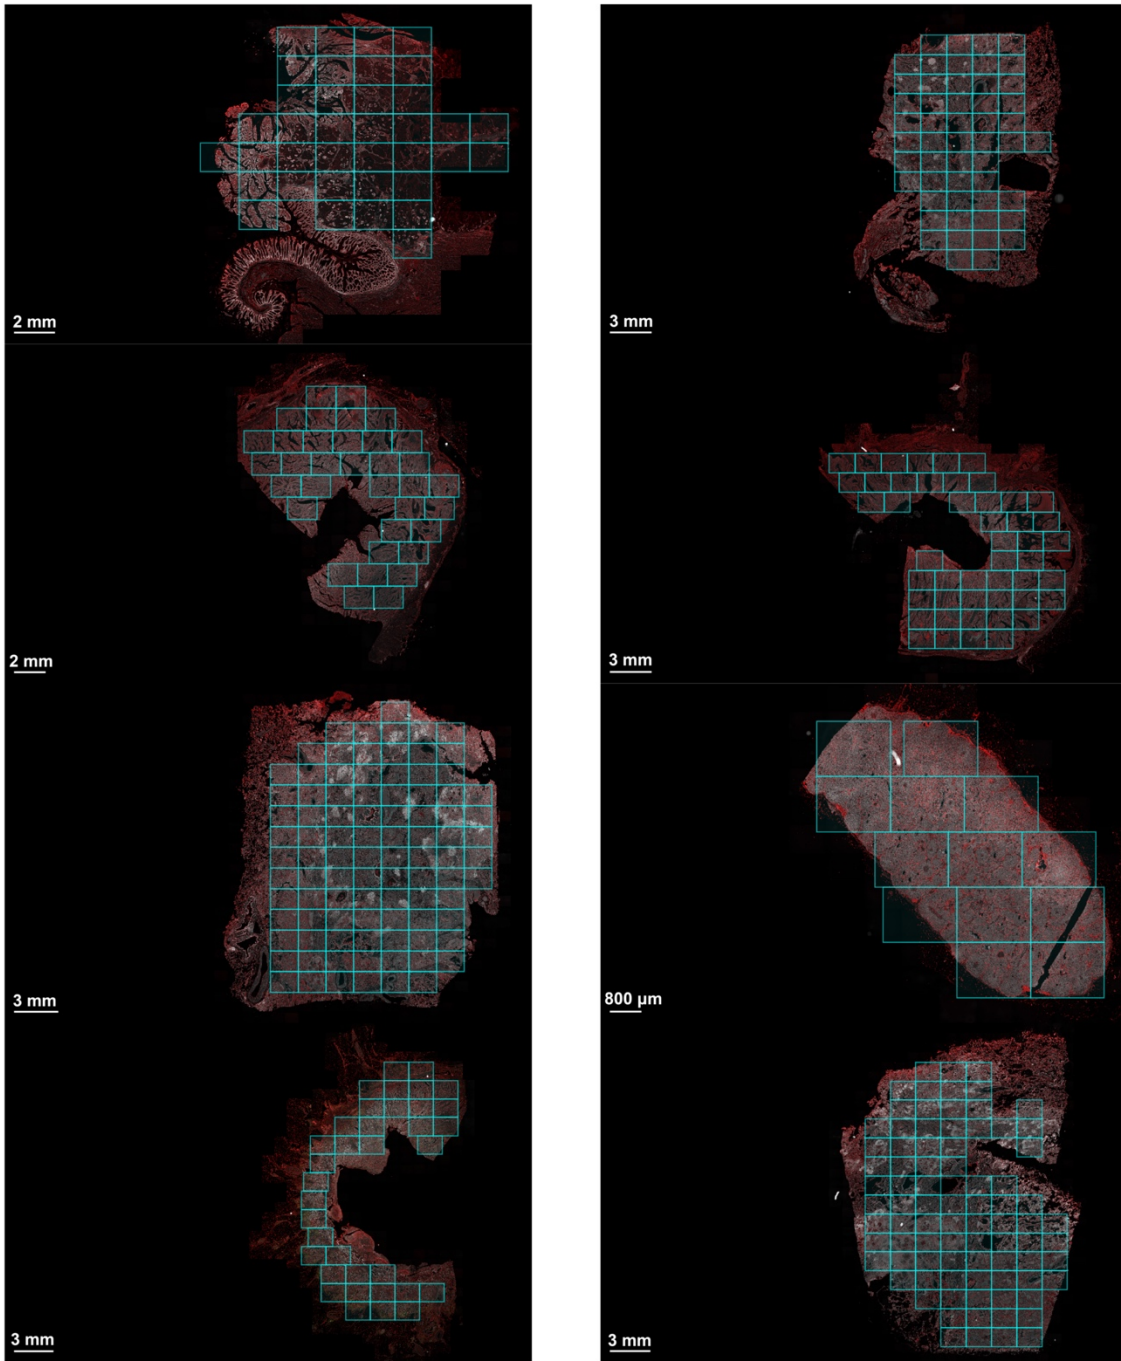

b

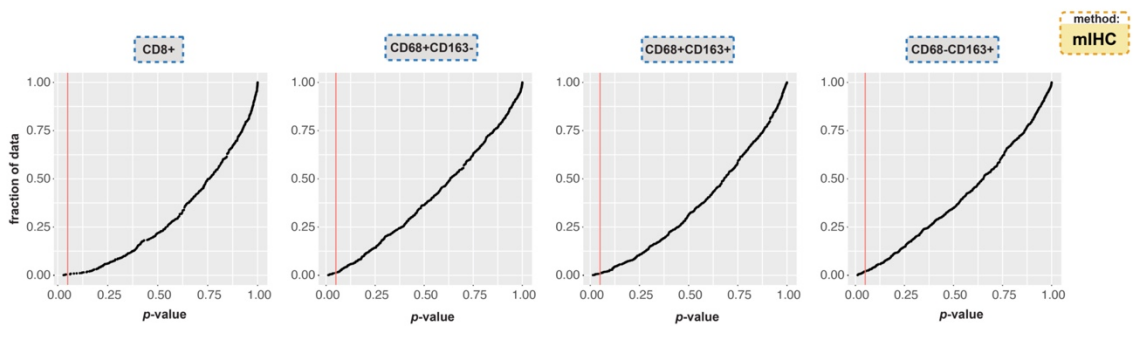

**Supplementary Figure 4, Related to Figure 1. Analysis of the representativity of the whole slide sections by the TMA samples.** (a) Digital scans of the WSS from eight tumour blocks (four from colorectal cancer and four from lung cancer) stained with antibodies against CD8, CD68 and CD163 (not visualized). Each digital WSS was applied for multispectral scanning using the ties equivalent to those applied for imaging TMA cores, illustrated as cyan rectangles. (b) The  $p$ -values, generated by two-sample Kolmogorov-Smirnov test repeated by 1000-times resampling are plotted as empirical cumulative distributions for each of the marker. The cut-off  $p$ -value=0.050 is indicated by vertical red line.

**a**

method: **mIHC** SIA =  $\frac{CD8+}{CD8+ (CD68+CD163+)}$

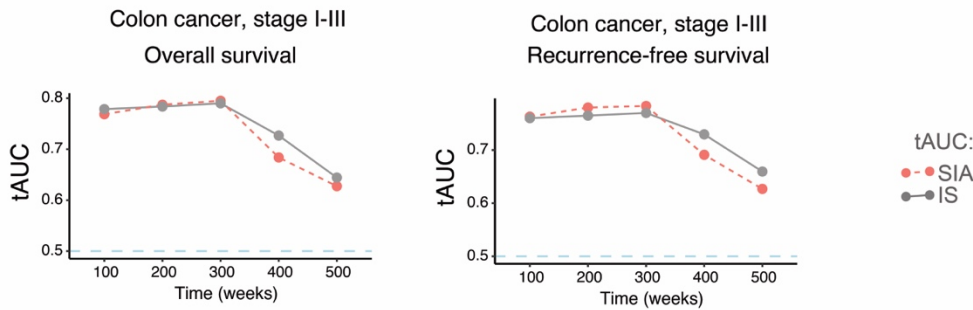

**b**

|                          |                            | SIA   |         | Immunoscore |       |
|--------------------------|----------------------------|-------|---------|-------------|-------|
|                          |                            | M     | F       | M           | F     |
| Overall survival         | <i>n</i>                   | 149   | 137     | 149         | 137   |
|                          | high / low, <i>p</i> =     | 0.037 | 0.0012  | 0.25        | 0.026 |
|                          | intermed./ low, <i>p</i> = | 0.409 | 0.037   | 0.029       | 0.031 |
| Recurrence-free survival | <i>n</i>                   | 149   | 136     | 149         | 136   |
|                          | high / low, <i>p</i> =     | 0.096 | 0.00050 | 0.094       | 0.055 |
|                          | intermed./ low, <i>p</i> = | 0.58  | 0.011   | 0.023       | 0.053 |

**c**

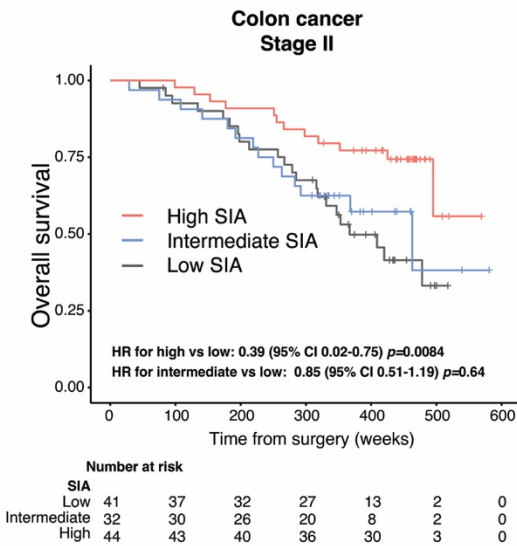

**d**

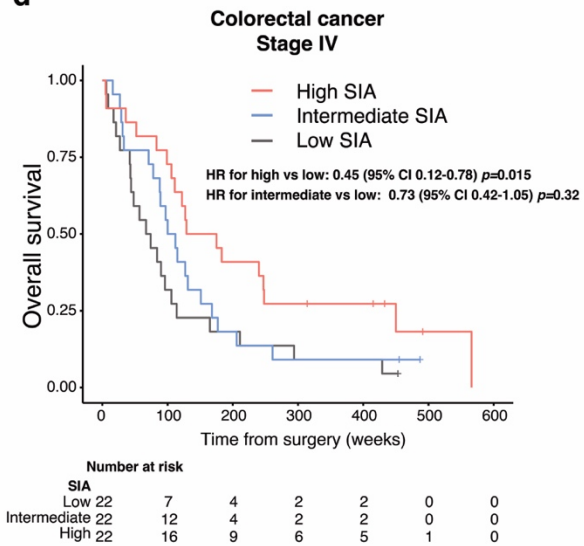

**Supplementary Figure 5, Related to Figure 2. (a) Predictive accuracy of SIA and IS for OS and PFS in colon cancer stage I-III, demonstrated by tAUC analysis. No statistically significant difference is found between SIA and IS at different timepoints. (b) Predictive accuracy of SIA and IS for OS and PFS in colon cancer stage I-III, analysed in females and males. The SIA is prognostic in (c) therapy-naïve colon cancer stage II patients (n=117) and (d) metastatic colorectal cancer patients (n=66). Kaplan-Meier curves and numbers at risk demonstrate OS in patient groups, stratified by trichotomized SIA. Cox proportional hazards models were used to estimate relative hazards. SIA, signature of immune activation.**

**Expression levels of the M2-associated genes**

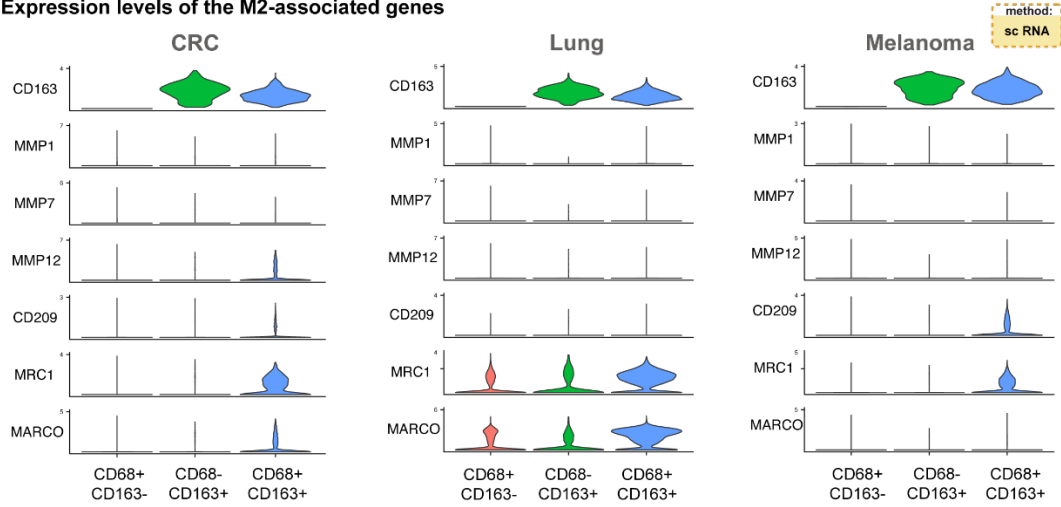

**Expression levels of the M1-associated genes**

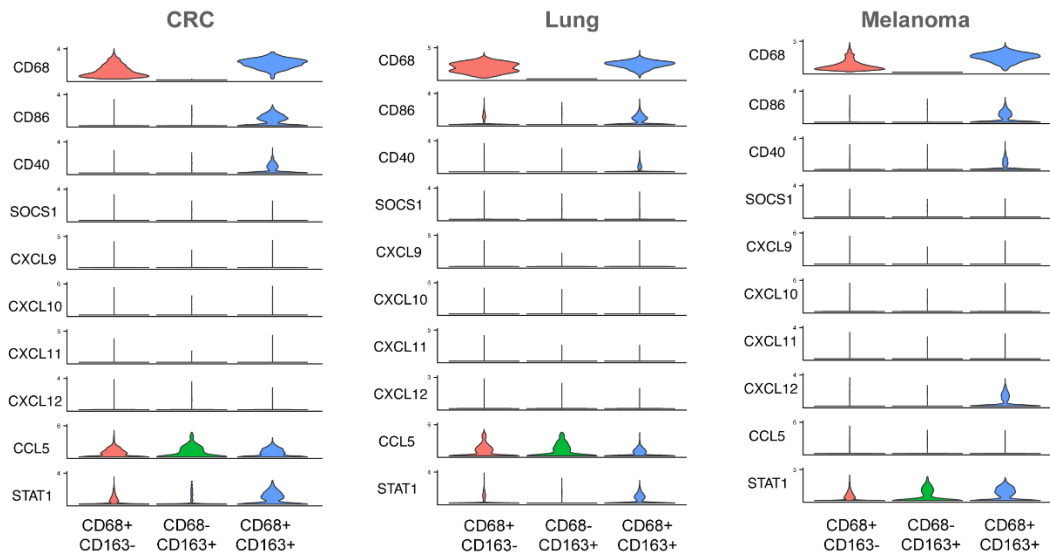

**Expression levels of monocyte-associated genes**

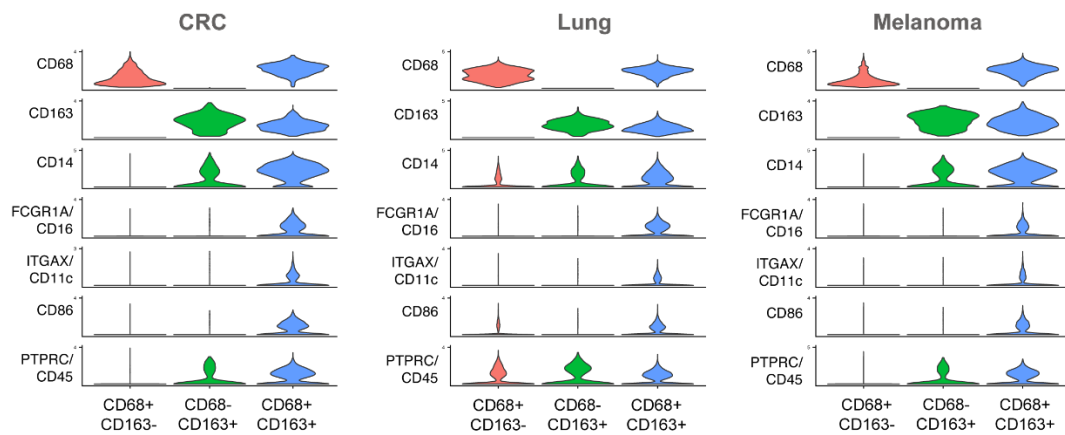

**Supplementary Figure 6, Related to Figure 4. Expression level distributions of macrophage type M1- and M2-associated genes.**



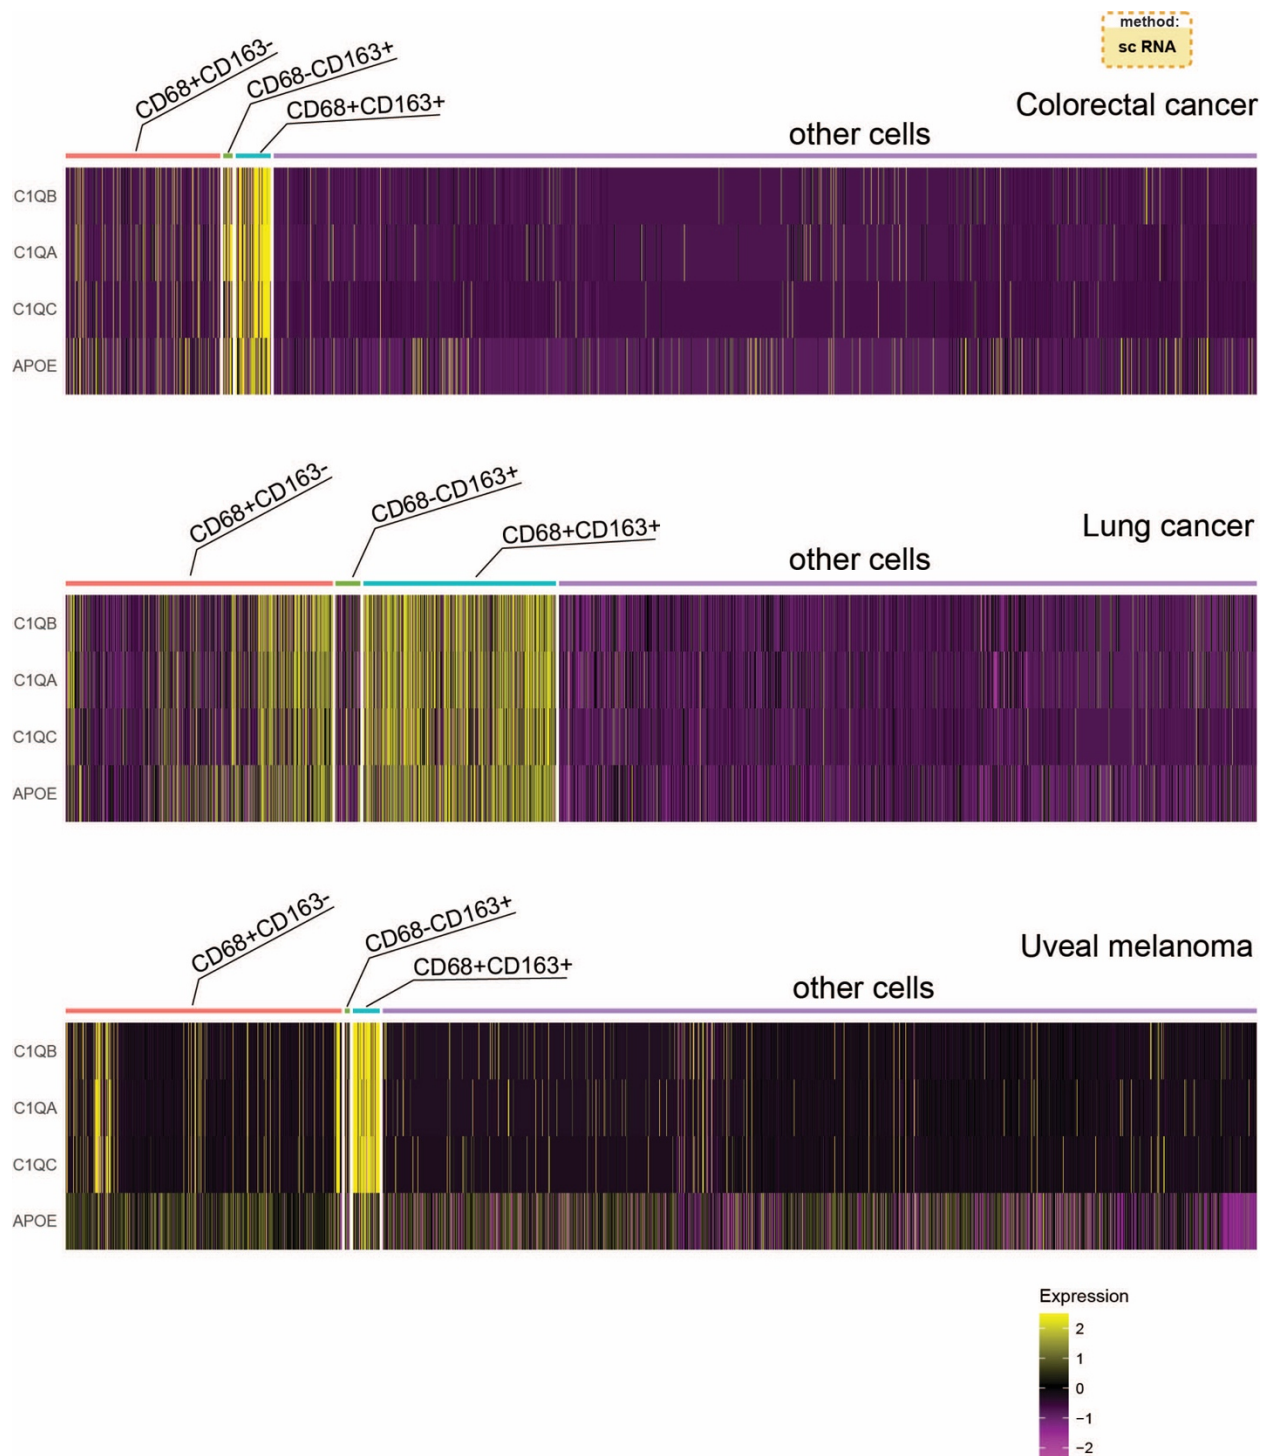

**Supplementary Figure 7, Related to Figure 4. Complement complex C1q expression is a hallmark of M2-like macrophages in the three tumour types.** Heatmap of scaled gene expression values of C1QA, C1QB, C1QC and APOE within M1-like, M2-like and CD68<sup>-</sup>CD163<sup>+</sup> macrophage classes and in other cells in the single-cell RNA sequencing datasets from colon cancers (42), lung cancers (43) and uveal melanoma (44).

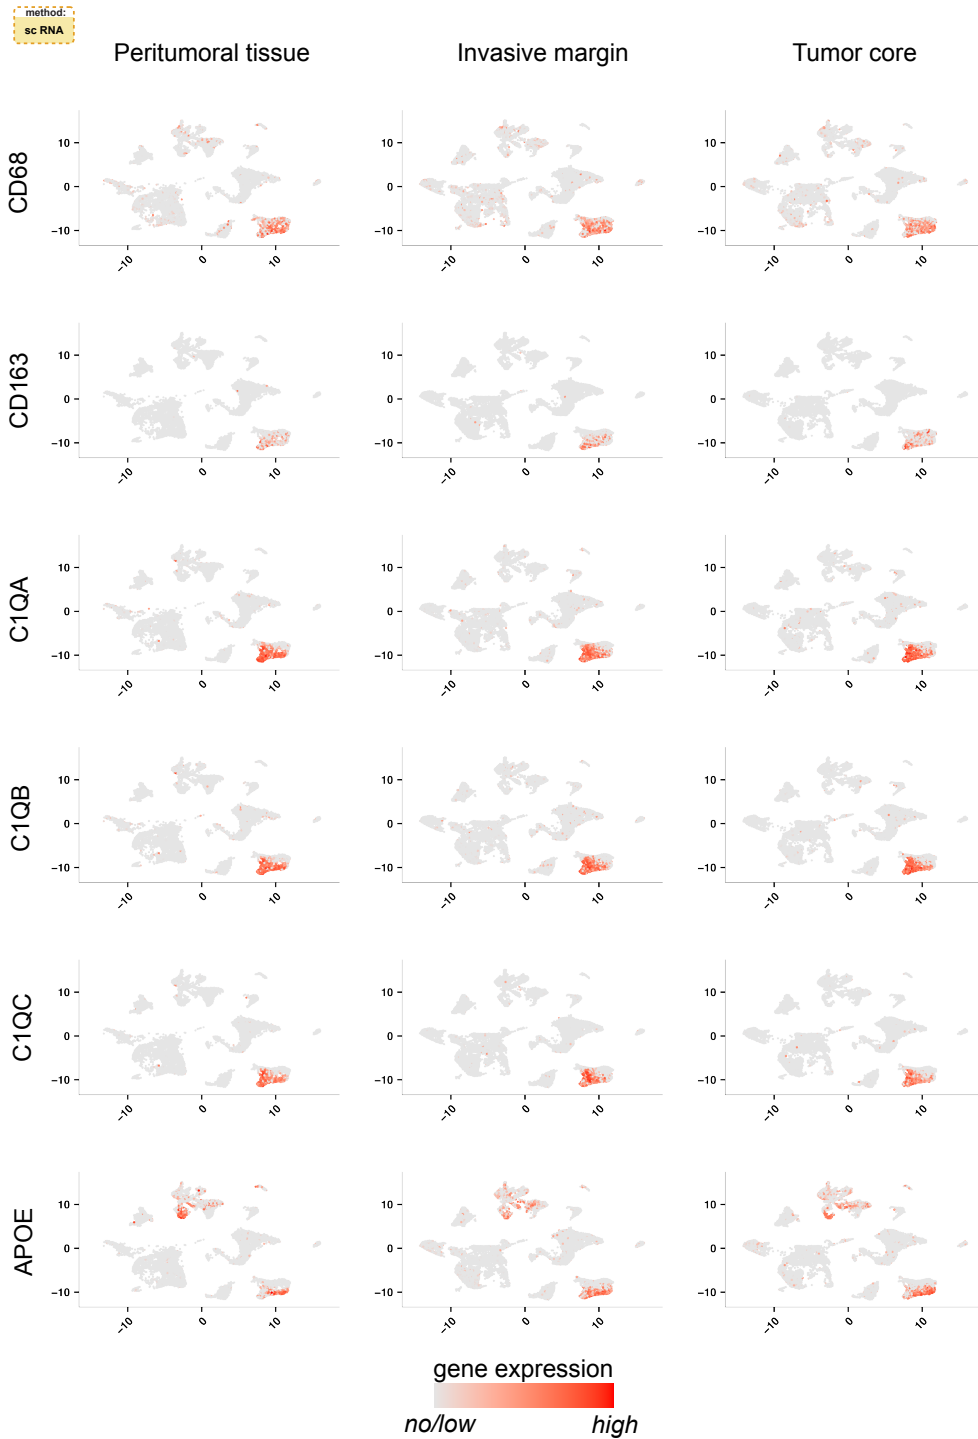

**Supplementary Figure 8, Related to Figure 4. Complement complex C1q and APOE expression level is similar in different regions of colorectal cancer and peritumoral tissue.** tSNE plots demonstrating the clustering of the cells from the colorectal cancer single-cell RNA sequencing dataset (42) split into three groups according to the location of the collected sample. The cells coloured according to the scaled expression values are analysed genes (CD68, CD163, C1QA, C1QB, C1QC and APOE).

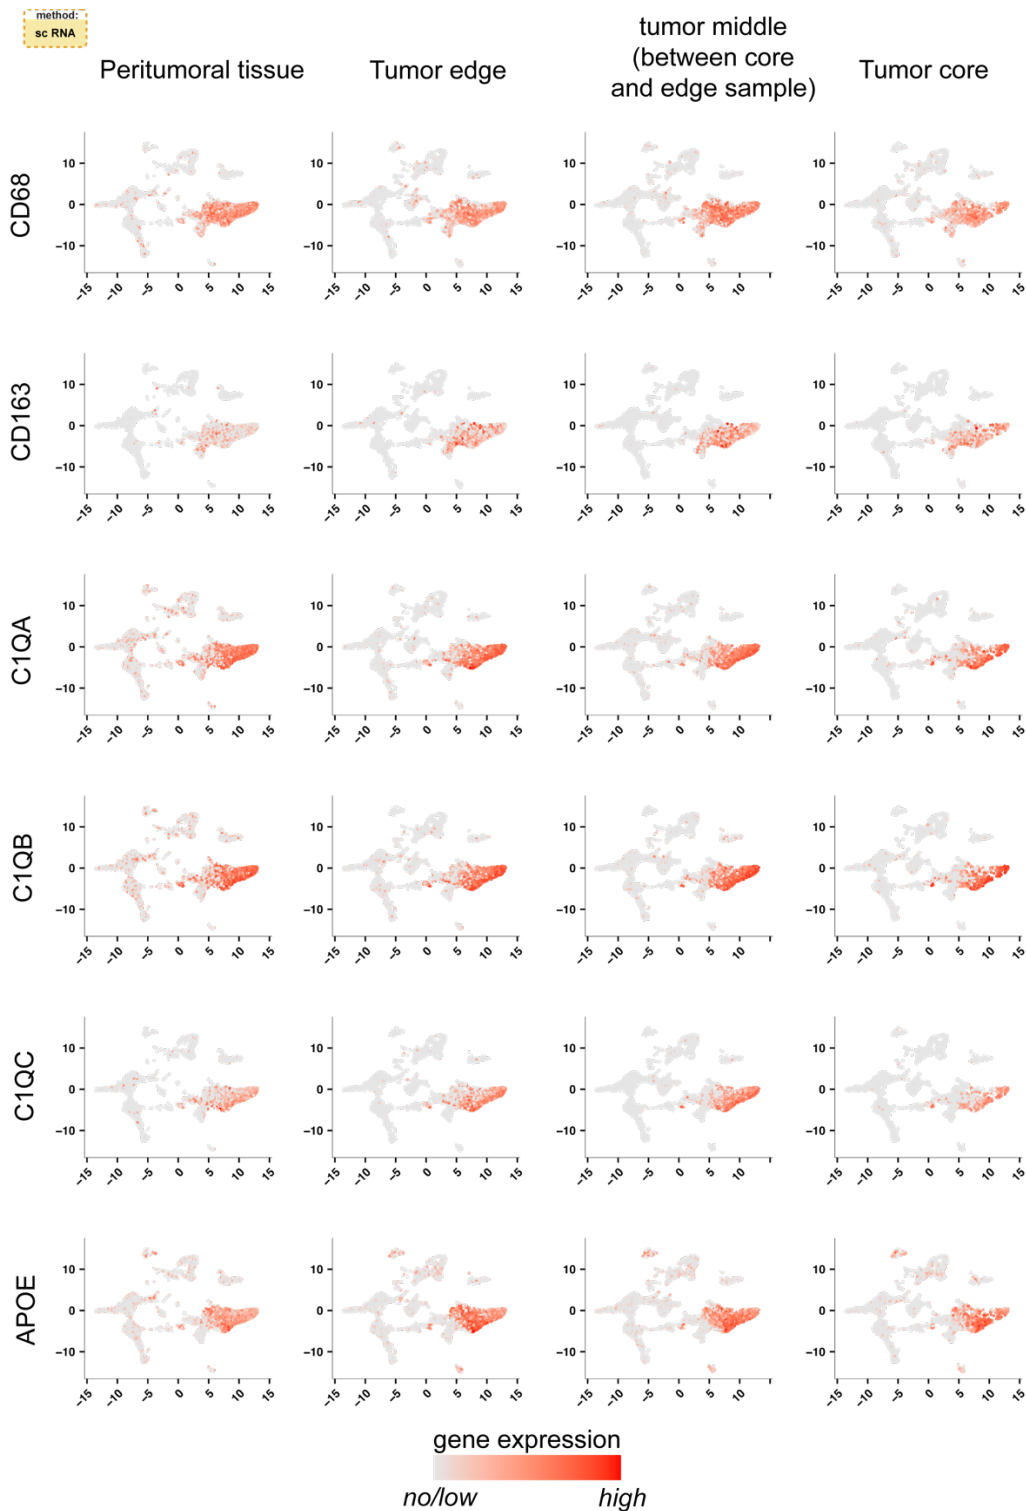

**Supplementary Figure 9, Related to Figure 4. Complement complex C1q and APOE expression level is similar in different regions of lung cancer and peritumoral tissue.** tSNE plots demonstrating the clustering of the cells from the lung cancer single-cell RNA sequencing dataset (43) split into three groups according to the location of the collected sample. The cells coloured according to the scaled expression values are analysed genes (CD68, CD163, C1QA, C1QB, C1QC and APOE).

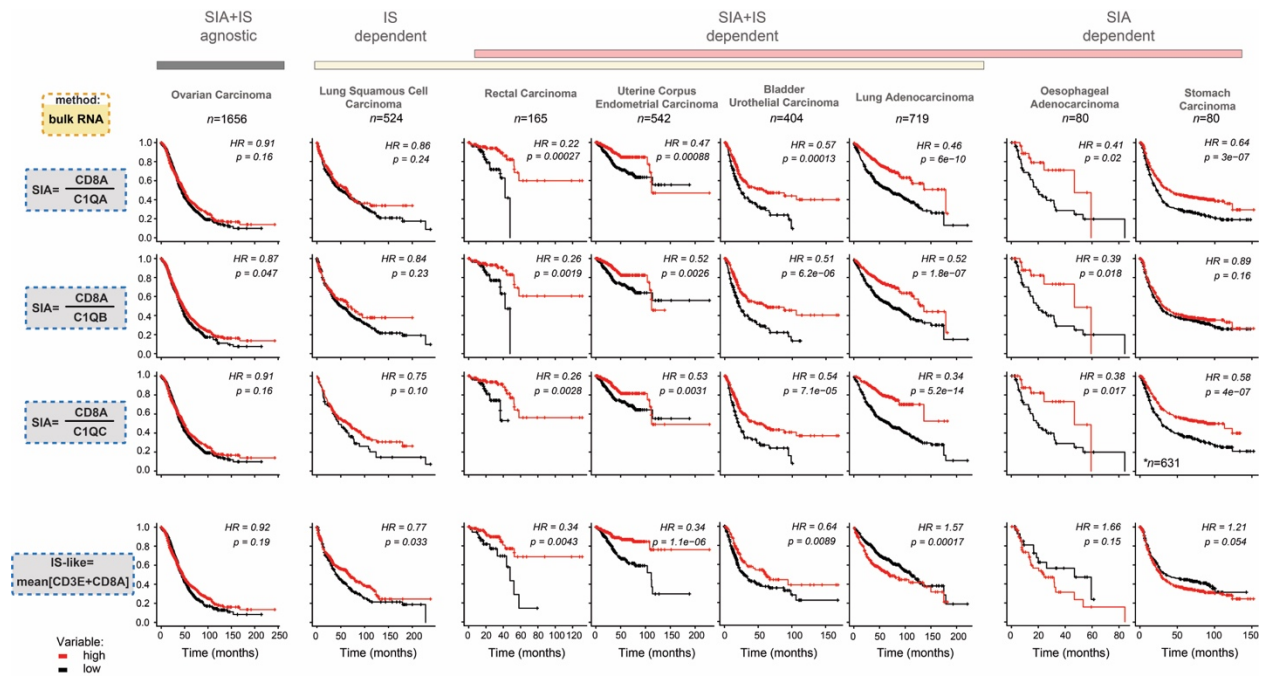

**Supplementary Figure 10, Related to Figure 4. The bulk-RNA-derived SIA is prognostic in bladder cancer, oesophageal adenocarcinoma, stomach adenocarcinoma, lung adenocarcinoma and melanoma.** Overall survival stratified by dichotomized ratio between the bulk RNA expression levels of CD8A and each of C1q complement subunits: C1QA, C1QB and C1QC in seven tumour types (three upper panels) and overall survival stratified by dichotomized average bulk RNA expression levels of CD8A and CD3E (IS-like metric). Gene expression and survival data was achieved from the KM plotter database: bladder, oesophageal, rectal, endometrial cancers (48), ovarian cancer (49), gastric cancer (50), lung adenocarcinoma and lung squamous cell carcinoma (51).

## Supplementary Tables

**Supplementary Table 1, Related to Figure 1. Baseline clinicopathological characteristics of the colon cancer cohort used for univariate associations of tissue immune cell densities and survival.** Patient data shown for cases where successful staining was available from the Lymphocyte panel, the NK/Macrophage panels. Values are shown as the number of cases (percentages) unless indicated otherwise. Percentages may not add to 100% due to rounding. MSI, microsatellite instability; MMR, mismatch repair;

| Characteristics           | Lymphocyte panel<br>(n = 298) | NK/Macrophage<br>panel (n = 288) |
|---------------------------|-------------------------------|----------------------------------|
| <b>Age</b>                |                               |                                  |
| Average age in years ± SD | 69.97 ± 12.70                 | 69.98 ± 12.75                    |
| ≤ 75 years old            | 187 (62.8%)                   | 179 (62.2%)                      |
| > 75 years old            | 111 (37.2%)                   | 109 (37.8%)                      |
| <b>Sex</b>                |                               |                                  |
| Male                      | 154 (51.7)                    | 139 (48.3)                       |
| Female                    | 144 (48.3)                    | 149 (51.7)                       |
| <b>pT Stage</b>           |                               |                                  |
| 0                         | 0                             | 0                                |
| 1                         | 26 (8.7%)                     | 24 (8.3%)                        |
| 2                         | 16 (5.4%)                     | 15 (5.2%)                        |
| 3                         | 203 (68.1%)                   | 199 (69.1%)                      |
| 4                         | 53 (17.8%)                    | 50 (17.4%)                       |
| Missing data              | 0                             | 0                                |
| <b>pN Stage</b>           |                               |                                  |
| 0                         | 157 (52.7%)                   | 151 (52.4%)                      |
| 1+                        | 140 (47%)                     | 136 (47.2%)                      |
| Missing data              | 1 (0.3%)                      | 1 (0.3%)                         |
| <b>pM Stage</b>           |                               |                                  |
| 0                         | 296 (99.3%)                   | 286 (99.3%)                      |
| 1                         | 0                             | 0                                |
| Missing data              | 2 (0.7%)                      | 2 (0.7%)                         |
| <b>pTNM stage</b>         |                               |                                  |
| 0                         | 0                             | 0                                |
| 1                         | 37 (12.4%)                    | 34 (11.8%)                       |
| 2                         | 121 (40.6%)                   | 118 (41%)                        |
| 3                         | 140 (47%)                     | 136 (47.2%)                      |
| 4                         | 0                             | 0                                |
| Missing data              | 0                             | 0                                |

|                              |             |             |
|------------------------------|-------------|-------------|
| <b>Differentiation Grade</b> |             |             |
| Low                          | 220 (73.8%) | 212 (73.6%) |
| High                         | 47 (15.8%)  | 46 (16%)    |
| Missing data                 | 31 (10.4%)  | 30 (10.4%)  |
| <b>Neural Invasion</b>       |             |             |
| No                           | 228 (76.5%) | 219 (76%)   |
| Yes                          | 36 (12.1%)  | 35 (12.2%)  |
| Missing data                 | 34 (11.4%)  | 34 (11.8%)  |
| <b>Vascular Invasion</b>     |             |             |
| No                           | 202 (67.8%) | 195 (67.7%) |
| Yes                          | 71 (23.8%)  | 68 (23.6%)  |
| Missing data                 | 25 (8.4%)   | 25 (8.7%)   |
| <b>MSI/MMR Status</b>        |             |             |
| MMR proficient               | 237 (79.5%) | 228 (79.2%) |
| MMR deficient                | 53 (17.8%)  | 51 (17.7%)  |
| Missing data                 | 8 (2.7%)    | 9 (3.1%)    |
| <b>BRAF Mutation</b>         |             |             |
| No                           | 139 (46.6%) | 133 (46.2%) |
| Yes                          | 34 (11.4%)  | 33 (11.5%)  |
| Missing data                 | 125 (41.9%) | 122 (42.4%) |

**Supplementary Table 2, Related to Figure 2. Baseline clinicopathological characteristics of the colorectal cancer sub-cohorts used for SIA analysis.** Patient data shown for cases where successful staining was available from both Lymphocyte panel and NK/Macrophage panels and SIA was calculated. Values are shown as the number of cases (percentages) unless indicated otherwise. Percentages may not add to 100% due to rounding. MSI, microsatellite instability; MMR, mismatch repair;

| <b>Characteristics</b>       | Colon cancer stage I-III,<br>therapy-naïve<br>(n = 286) | Colon cancer stage II,<br>therapy-naïve<br>(n = 117) | Colorectal cancer<br>stage IV, therapy-naïve<br>(n = 66) |
|------------------------------|---------------------------------------------------------|------------------------------------------------------|----------------------------------------------------------|
| <b>Age</b>                   |                                                         |                                                      |                                                          |
| Average age in years ±<br>SD | 70.01 ± 12.73                                           | 70.98 ± 13.46                                        | 70.38 ± 11.01                                            |
| ≤ 75 years old               | 178 (62.2%)                                             | 70 (59.8%)                                           | 41 (62.1%)                                               |
| > 75 years old               | 108 (37.8%)                                             | 47 (40.2%)                                           | 25 (37.9%)                                               |
| <b>Sex</b>                   |                                                         |                                                      |                                                          |
| Male                         | 149 (52.1%)                                             | 57 (48.7%)                                           | 36 (54.5%)                                               |
| Female                       | 137 (47.9%)                                             | 60 (51.3%)                                           | 30 (45.5%)                                               |
| <b>Location</b>              |                                                         |                                                      |                                                          |
| Colon                        | 286 (100%)                                              | 117 (100%)                                           | 61 (92.4%)                                               |
| Rectum                       | 0                                                       | 0                                                    | 5 (7.6%)                                                 |
| <b>pT Stage</b>              |                                                         |                                                      |                                                          |
| 0                            | 0                                                       | 0                                                    | 0                                                        |
| 1                            | 24 (8.4%)                                               | 0                                                    | 2 (3%)                                                   |
| 2                            | 15 (5.2%)                                               | 0                                                    | 1 (1.5%)                                                 |
| 3                            | 198 (69.2%)                                             | 98 (83.8%)                                           | 26 (39.4%)                                               |
| 4                            | 49 (17.1%)                                              | 19 (16.2%)                                           | 33 (50%)                                                 |
| Missing data                 | 0                                                       | 0                                                    | 4 (6.1%)                                                 |
| <b>pN Stage</b>              |                                                         |                                                      |                                                          |
| 0                            | 150 (52.4%)                                             | 117 (100%)                                           | 14 (21.2%)                                               |
| 1+                           | 135 (47.2%)                                             | 0                                                    | 52 (78.8%)                                               |
| Missing data                 | 1 (0.3%)                                                | 0                                                    | 0                                                        |
| <b>pM Stage</b>              |                                                         |                                                      |                                                          |
| 0                            | 284 (99.3%)                                             | 116 (99.1%)                                          | 0                                                        |
| 1                            | 0                                                       | 1 (0.9%)                                             | 66 (100%)                                                |
| Missing data                 | 2 (0.7%)                                                | 0                                                    | 0                                                        |
| <b>pTNM stage</b>            |                                                         |                                                      |                                                          |
| 0                            | 0                                                       | 0                                                    | 0                                                        |
| 1                            | 34 (11.9%)                                              | 0                                                    | 0                                                        |
| 2                            | 117 (40.9%)                                             | 117 (100%)                                           | 0                                                        |
| 3                            | 135 (47.2%)                                             | 0                                                    | 0                                                        |

|                              |             |             |            |
|------------------------------|-------------|-------------|------------|
| 4                            | 0           | 0           | 66 (100%)  |
| Missing data                 | 0           | 0           | 0          |
| <b>Differentiation Grade</b> |             |             |            |
| Low                          | 211 (73.8%) | 101 (86.3%) | 29 (43.9%) |
| High                         | 45 (15.7%)  | 13 (11.1%)  | 23 (34.8%) |
| Missing data                 | 30 (10.5%)  | 3 (2.6%)    | 14 (21.2%) |
| <b>Neural Invasion</b>       |             |             |            |
| No                           | 217 (75.9%) | 98 (83.8%)  | 29 (43.9%) |
| Yes                          | 35 (12.2%)  | 7 (6%)      | 24 (36.4%) |
| Missing data                 | 34 (11.9%)  | 12 (10.3%)  | 13 (19.7%) |
| <b>Vascular Invasion</b>     |             |             |            |
| No                           | 193 (67.5%) | 92 (78.6%)  | 21 (31.8%) |
| Yes                          | 68 (23.8%)  | 15 (12.8%)  | 32 (48.5%) |
| Missing data                 | 25 (8.7%)   | 10 (8.5%)   | 13 (19.7%) |
| <b>MSI/MMR Status</b>        |             |             |            |
| MMR proficient               | 228 (79.7%) | 86 (73.5%)  | 56 (84.8%) |
| MMR deficient                | 50 (17.5%)  | 28 (23.9%)  | 8 (12.1%)  |
| Missing data                 | 8 (2.8%)    | 3 (2.6%)    | 2 (3%)     |
| <b>BRAF Mutation</b>         |             |             |            |
| No                           | 132 (46.2%) | 49 (41.9%)  | 40 (60.6%) |
| Yes                          | 33 (11.5%)  | 10 (8.5%)   | 11 (16.7%) |
| Missing data                 | 121 (42.3%) | 58 (49.5%)  | 15 (22.7%) |



**Supplementary Table 3, Related to Figure 3. Baseline clinicopathological characteristics of validation cohorts.** Data from cases where SIA could be computed. Values are shown as the number of cases (percentages) unless indicated otherwise. Percentages rounded to one decimal. \*Median survival times were calculated using the Kaplan-Meier method. Mean survival times were estimated when median survival times cannot be calculated from the data.

|                                                     | Endometrial Cancer          | Lung Adenocarcinoma | Lung Squamous Cell Carcinoma | Urine Bladder Cancer | Ovarian Cancer | Gastro-oesophageal Cancer | Melanoma      |
|-----------------------------------------------------|-----------------------------|---------------------|------------------------------|----------------------|----------------|---------------------------|---------------|
| <b>Patient sample size and median survival time</b> |                             |                     |                              |                      |                |                           |               |
| Total number of patients (%)                        | 295 (26.1%)                 | 163 (13.1%)         | 89 (7.2%)                    | 224 (19.8%)          | 141 (12.5%)    | 127 (11.2%)               | 94 (8.3%)     |
| Median survival time* ± SD (weeks)                  | 545.08 ± 14.19 <sup>b</sup> | 252 ± 43.44         | 324 ± 67.01                  | 348 ± 50.85          | 151 ± 18.55    | 113 ± 20.80               | 478.4 ± 56.96 |
| <b>Age at diagnosis</b>                             |                             |                     |                              |                      |                |                           |               |
| Mean ± SD                                           | 66 ± 10.47                  | 66.71 ± 7.40        | 68.31 ± 7.50                 | 70.69 ± 11.81        | 63.70 ± 8.39   | 70.8 ± 11.04              | 60.45 ± 14.61 |
| Median ± SD                                         | 66 ± 10.47                  | 66 ± 7.40           | 68 ± 7.50                    | 72 ± 11.81           | 63 ± 8.39      | 72 ± 11.04                | 61.09 ± 14.61 |
| ≤ Median                                            | 152 (51.5%)                 | 83 (50.9%)          | 45 (50.6%)                   | 115 (51.3%)          | 73 (51.8%)     | 64 (50.4%)                | 47 (50%)      |
| > Median                                            | 143 (48.5%)                 | 80 (49.1%)          | 44 (49.4%)                   | 109 (48.7%)          | 68 (48.2%)     | 63 (49.6%)                | 47 (50%)      |
| <b>Sex</b>                                          |                             |                     |                              |                      |                |                           |               |
| Female                                              | 295 (100%)                  | 90 (55.2%)          | 38 (42.7%)                   | 50 (22.3%)           | 141 (100%)     | 29 (22.8%)                | 44 (46.8%)    |
| Male                                                | -                           | 73 (44.8%)          | 51 (57.3%)                   | 174 (77.7%)          | -              | 98 (77.2%)                | 50 (53.2%)    |
| <b>pT classification</b>                            |                             |                     |                              |                      |                |                           |               |
| pT0                                                 | -                           | -                   | -                            | 102 (45.5%)          | -              | 0                         | 0             |
| pT1                                                 | -                           | -                   | -                            | 95 (42.4%)           | -              | 7 (5.5%)                  | 23 (24.5%)    |
| pT2                                                 | -                           | -                   | -                            | 18 (8%)              | -              | 22 (17.3%)                | 27 (28.7%)    |
| pT3                                                 | -                           | -                   | -                            | 7 (3.1%)             | -              | 77 (60.6%)                | 23 (24.5%)    |
| pT4                                                 | -                           | -                   | -                            | 2 (0.9%)             | -              | 21 (16.5%)                | 15 (16%)      |
| Missing data                                        | 295 (100%)                  | 163 (100%)          | 89 (100%)                    | 0                    | 141 (100%)     | 0                         | 6 (6.4%)      |
| <b>pN classification</b>                            |                             |                     |                              |                      |                |                           |               |
| pN0                                                 | -                           | -                   | -                            | 24 (10.7%)           | -              | 36 (28.3%)                | -             |
| pN1                                                 | -                           | -                   | -                            | 5 (2.2%)             | -              | 26 (20.5%)                | -             |
| pN2                                                 | -                           | -                   | -                            | 0                    | -              | 33 (26%)                  | -             |
| pN3                                                 | -                           | -                   | -                            | 0                    | -              | 32 (25.2%)                | -             |
| Missing data                                        | 295 (100%)                  | 163 (100%)          | 89 (100%)                    | 195 (87.1%)          | 141 (100%)     | 0                         | 94 (100%)     |
| <b>pM classification</b>                            |                             |                     |                              |                      |                |                           |               |
| pM0                                                 | -                           | -                   | -                            | 60 (26.8%)           | -              | 116 (91.3%)               | -             |
| pM1                                                 | -                           | -                   | -                            | 18 (8%)              | -              | 3 (2.4%)                  | -             |

|                                                             |             |             |             |             |             |             |           |
|-------------------------------------------------------------|-------------|-------------|-------------|-------------|-------------|-------------|-----------|
| pM2                                                         | -           | -           | -           | 0           | -           | 8 (6.3%)    | -         |
| Missing data                                                | 295 (100%)  | 163 (100%)  | 89 (100%)   | 146 (65.2%) | 141 (100%)  | 0           | 94 (100%) |
| <b>Clinical stage at diagnosis</b>                          |             |             |             |             |             |             |           |
| 1                                                           | 242 (82%)   | 155 (61.8%) | 100 (61.3%) | 57 (64%)    | 23 (16.3%)  | -           | -         |
| 2                                                           | 8 (2.7%)    | 53 (21.1%)  | 27 (16.6%)  | 26 (29.2%)  | 16 (11.3%)  | -           | -         |
| 3                                                           | 39 (13.2%)  | 36 (14.3%)  | 30 (18.4%)  | 6 (6.7%)    | 72 (51.1%)  | -           | -         |
| 4                                                           | 6 (2%)      | 7 (2.8%)    | 6 (3.7%)    | 0           | 19 (13.5%)  | -           | -         |
| Missing data                                                | 0           | 0           | 0           | 0           | 11 (7.8%)   | 127 (100%)  | 94 (100%) |
| <b>Differentiation grade / Histological differentiation</b> |             |             |             |             |             |             |           |
| G1 Well differentiated (Low grade)                          | 247 (83.7%) | -           | -           | 71 (31.7%)  | 4 (2.8%)    | 77 (60.6%)  | -         |
| G2 Moderately differentiated (Intermediate grade)           | -           | -           | -           | -           | 31 (22%)    | -           | -         |
| G3 Poorly differentiated (High grade)                       | 48 (16.3%)  | -           | -           | 153 (68.3%) | 106 (75.2%) | 50 (39.4%)  | -         |
| Missing data                                                | 0           | 163 (100%)  | 89 (100%)   | 0           | 0           | 0           | 94 (100%) |
| <b>WHO performance status</b>                               |             |             |             |             |             |             |           |
| 0                                                           | -           | 104 (63.8%) | 50 (56.2%)  | -           | -           | -           | -         |
| 1                                                           | -           | 56 (34.4%)  | 39 (43.8%)  | -           | -           | -           | -         |
| 2                                                           | -           | 3 (1.8%)    | 0           | -           | -           | -           | -         |
| ≥ 3                                                         | -           | 0           | 0           | -           | -           | -           | -         |
| Missing data                                                | 295 (100%)  | 0           | 0           | 224 (100%)  | 141 (100%)  | 127 (100%)  | 94 (100%) |
| <b>Resection margin</b>                                     |             |             |             |             |             |             |           |
| R0                                                          | -           | -           | -           | -           | -           | 85 (66.9%)  | -         |
| R1                                                          | -           | -           | -           | -           | -           | 35 (27.6%)  | -         |
| R2                                                          | -           | -           | -           | -           | -           | 7 (5.5%)    | -         |
| Missing data                                                | 295 (100%)  | 163 (100%)  | 89 (100%)   | 224 (100%)  | 141 (100%)  | 0           | 94 (100%) |
| <b>p53 status</b>                                           |             |             |             |             |             |             |           |
| Mutant                                                      | 32 (10.8%)  | -           | -           | -           | -           | -           | -         |
| Wild-type                                                   | 263 (89.2%) | -           | -           | -           | -           | -           | -         |
| Missing data                                                | 0           | 163 (100%)  | 89 (100%)   | 224 (100%)  | 141 (100%)  | 127 (100%)  | 94 (100%) |
| <b>MSI/MSS status</b>                                       |             |             |             |             |             |             |           |
| MSI                                                         | -           | -           | -           | -           | 2 (1.4%)    | 11 (8.7%)   | -         |
| MSS                                                         | -           | -           | -           | -           | 136 (96.5%) | 116 (91.3%) | -         |
| Missing data                                                | 295 (100%)  | 163 (100%)  | 89 (100%)   | 224 (100%)  | 3 (2.1%)    | 0           | 94 (100%) |
| <b>Neural invasion</b>                                      |             |             |             |             |             |             |           |
| Yes                                                         | -           | -           | -           | -           | -           | 9 (7.1%)    | -         |

|                              |             |             |            |             |            |             |           |
|------------------------------|-------------|-------------|------------|-------------|------------|-------------|-----------|
| No                           | -           | -           | -          | -           | -          | 22 (17.3%)  | -         |
| Missing data                 | 295 (100%)  | 163 (100%)  | 89 (100%)  | 224 (100%)  | 141 (100%) | 96 (75.6%)  | 94 (100%) |
| <b>Vascular invasion</b>     |             |             |            |             |            |             |           |
| Yes                          | -           | -           | -          | -           | -          | 10 (7.9%)   | -         |
| No                           | -           | -           | -          | -           | -          | 41 (32.3%)  | -         |
| Missing data                 | 295 (100%)  | 163 (100%)  | 89 (100%)  | 224 (100%)  | 141 (100%) | 76 (59.8%)  | 94 (100%) |
| <b>Smoking history</b>       |             |             |            |             |            |             |           |
| Current smoker               | -           | 144 (88.3%) | 84 (94.4%) | 92 (41.1%)  | -          | -           | -         |
| Non-current smoker           | -           | 19 (11.7%)  | 5 (5.6%)   | 18 (8%)     | -          | -           | -         |
| Missing data                 | 295 (100%)  | 0           | 0          | 114 (50.9%) | 141 (100%) | 127 (100%)  | 94 (100%) |
| <b>Adjuvant treatment</b>    |             |             |            |             |            |             |           |
| Yes                          | 270 (91.5%) | -           | -          | 69 (30.8%)  | 70 (49.6%) | 10 (7.9%)   | -         |
| No                           | 25 (8.5%)   | -           | -          | 0           | 1 (0.7%)   | 117 (92.1%) | -         |
| Missing data                 | 0           | 163 (100%)  | 89 (100%)  | 115 (69.2%) | 70 (49.6%) | 0           | 94 (100%) |
| <b>Neoadjuvant treatment</b> |             |             |            |             |            |             |           |
| Yes                          | -           | 0           | 0          | 2 (0.9%)    | -          | -           | -         |
| No                           | -           | 251 (100%)  | 89 (100%)  | 0           | -          | -           | -         |
| Missing data                 | 295 (100%)  | 0           |            | 222 (99.1%) | 141 (100%) | 127 (100%)  | 94 (100%) |

**Supplementary Table 4, Antibodies and amplification reagents used for multiplex fluorescence IHC.**

Staining protocols were established for the lymphocyte and the NK/macrophage panel, respectively. The staining procedure included 5 to 6 cycles of microwave treatment, incubation with primary antibody, and amplification system fluorophore labelling. The final cycle was followed by DAPI staining and slide mounting. \*Antigen retrieval performed in microwave oven at 100 °C, 15min. †Amplification systems ImmPRESS® HRP or Opal HRP were used: The ImmPRESS® HRP Anti-Mouse IgG (Peroxidase) (Cat. No: MP-7402-50) and Anti-Rabbit IgG (Peroxidase) Polymer Detection Kits, made in Horse (Cat No: MP-7401-50) (Vector Laboratories); Opal™ Polymer anti-Rabbit+anti-Mouse HRP Kit (Cat No: ARH1001EA) (Akoya). #in melanoma instead of cytokeratin/E-cadherin cocktail, Melan A was used to identify malignant tissue vs stroma.

| Panel               | Order | Antigen retrieval* | Marker      | RRID        | Clone   | Host Species | Dilution | Amplification/enzyme reagent† | Company        |
|---------------------|-------|--------------------|-------------|-------------|---------|--------------|----------|-------------------------------|----------------|
| Lymphocyte panel    | 1.    | pH9                | CD8a        | AB_11150240 | C8/144B | Mouse        | 1:250    | ImPress                       | Thermo Fisher  |
|                     | 2.    | pH9                | CD4         | AB_2728838  | 4B12    | Mouse        | 1:100    | ImPress                       | Agilent        |
|                     | 3.    | pH6                | CD20        | AB_2282030  | L26     | Mouse        | 1:1500   | Opal HRP                      | Agilent        |
|                     | 4.    | pH6                | FoxP3       | AB_2797979  | D6O8R   | Rabbit       | 1:300    | ImPress                       | Cell Signaling |
|                     | 5.    | pH6                | CD45RO      | AB_1072483  | UCHL1   | Mouse        | 1:400    | Opal HRP                      | Thermo Fisher  |
|                     | 6.    | pH6                | PanCK       | AB_306047   | C-11    | Mouse        | 1:100    | Opal HRP                      | Abcam          |
|                     |       |                    | Cytokeratin | AB_2132885  | AE1/AE3 | Mouse        | 1:400    |                               | Agilent        |
|                     |       |                    | E-cadherin  | AB_397581   | 36/E    | Mouse        | 1:2000   |                               | BD Biosciences |
|                     | 6.#   | pH6                | Melan A     | AB_2335691  | A103    | Mouse        | 1:100    | ImPress                       | Agilent        |
| 7.                  | -     | DAPI               | -           | -           | -       | -            | -        | Akoya                         |                |
| NK/Macrophage panel | 1.    | pH6                | CD3         | AB_2631163  | F7.2.38 | Mouse        | 1:80     | ImPress                       | Agilent        |
|                     | 2.    | pH6                | CD56        | AB_2750583  | 123C3   | Mouse        | 1:100    | ImPress                       | Agilent        |
|                     | 3.    | pH6                | NKp46       | AB_2746835  | NCR1    | Rabbit       | 1:150    | ImPress                       | Thermo Fisher  |
|                     | 4.    | pH6                | CD68        | AB_2074844  | PG-M1   | Mouse        | 1:100    | Opal HRP                      | Agilent        |
|                     | 5.    | pH6                | CD163       | AB_2756375  | 10D6    | Mouse        | 1:400    | Opal HRP                      | Novocastra     |
|                     | 6.    | pH6                | PanCK       | AB_306047   | C-11    | Mouse        | 1:100    | Opal HRP                      | Abcam          |
|                     |       |                    | Cytokeratin | AB_2132885  | AE1/AE3 | Mouse        | 1:500    |                               | Agilent        |
|                     |       |                    | E-cadherin  | AB_397581   | 36/E    | Mouse        | 1:2000   |                               | BD Biosciences |
|                     | 6.#   | pH6                | Melan A     | AB_2335691  | A103    | Mouse        | 1:100    | ImPress                       | Agilent        |
| 7.                  | -     | DAPI               | -           | -           | -       | -            | -        | Akoya                         |                |
